# Supplementary material for: Alkali metal impact on structural and phonon properties of Er3+ and Tm3+ co-doped MY(WO4)2 (M = Li, Na, K) nanocrystals
Source: Royal Society of Chemistry journal article supplement (doi:10.1039/c7ra10706d), 2018-01-01
Supplement: c7ra10706d1.pdf [file c7ra10706d1.pdf]

## Supporting Information

### Alkali metal impact on structural and phonon properties of $\text{Er}^{3+}$ and $\text{Tm}^{3+}$ co-doped $\text{MY}(\text{WO}_4)_2$ ( $\text{M} = \text{Li}, \text{Na}, \text{K}$ ) nanocrystals

*Paulina Ropuszyńska-Robak, Paweł E. Tomaszewski, Leszek Kępiński, Lucyna Macalik*

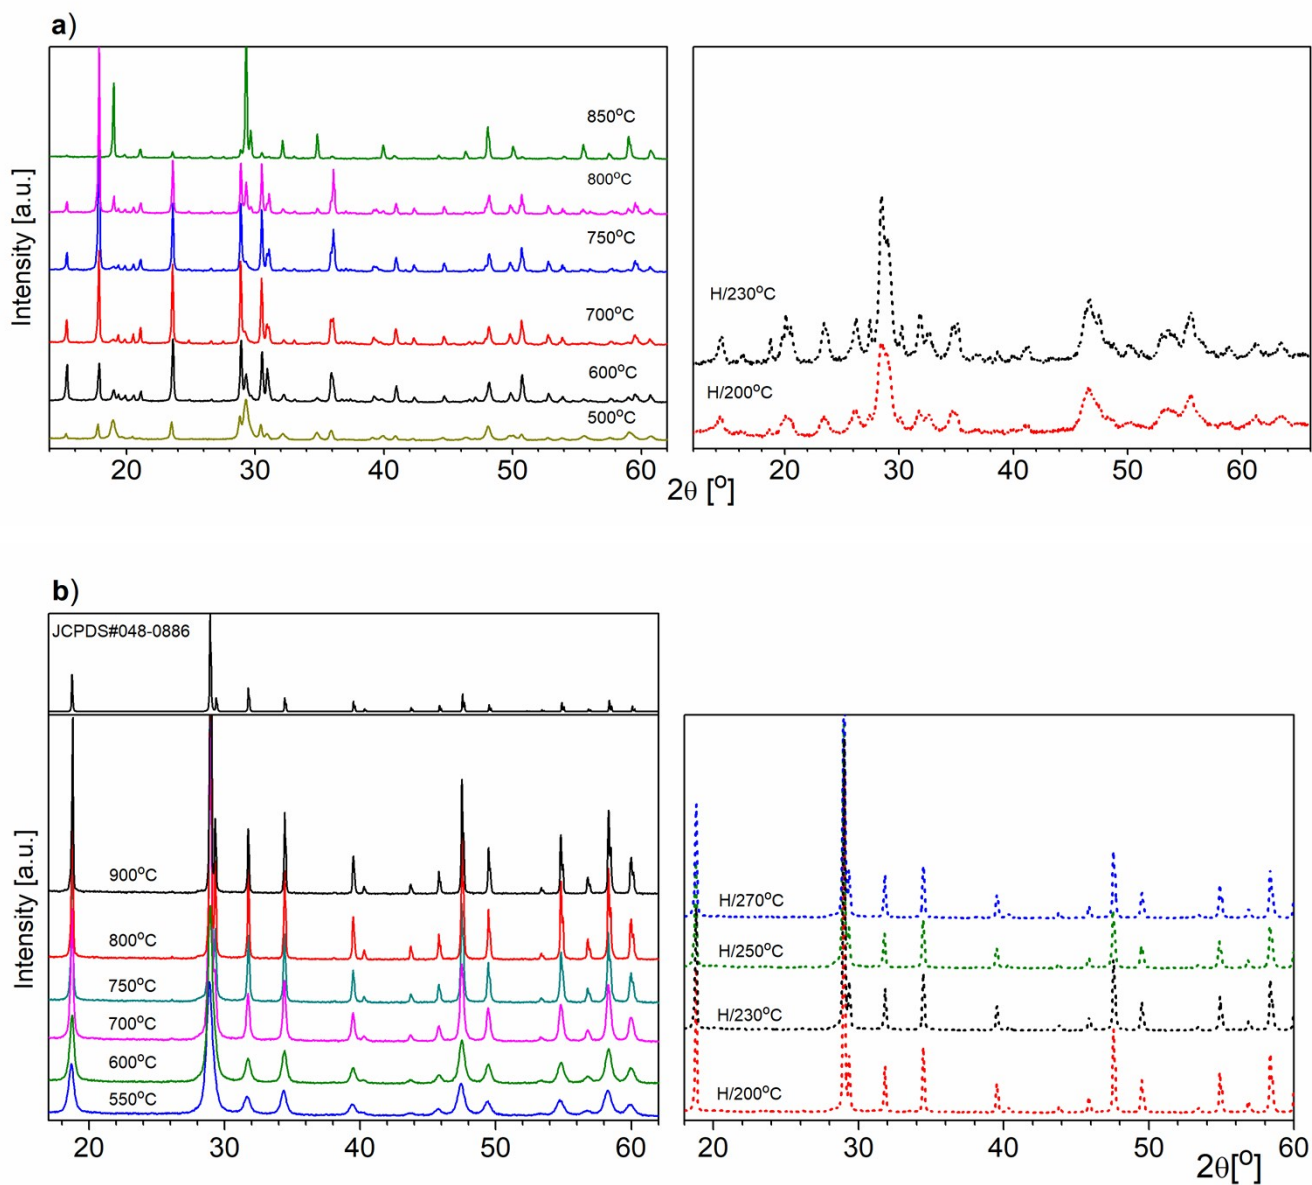

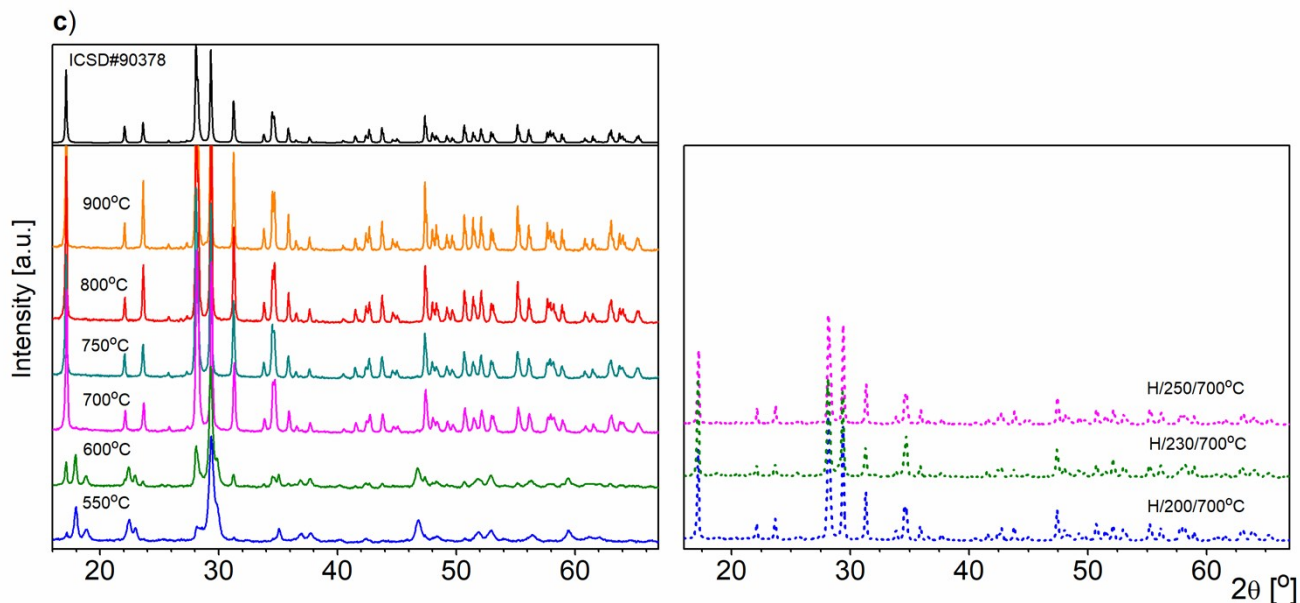

**Figure S1.** The selected diffraction patterns of (a)  $\text{LiY}(\text{WO}_4)_2:\text{Er,Tm}$ , (b)  $\text{NaY}(\text{WO}_4)_2:\text{Er,Tm}$  and (c)  $\text{KY}(\text{WO}_4)_2:\text{Er,Tm}$  nanopowders obtained by the Pechini method calcined at various temperatures (solid line) and by the hydrothermal method (broken line). Diffraction pattern of the standard monoclinic [E. Gallucci, C. Goutaudier, M.T. Cohen-Addad, B.F. Mentzen, T. Hansen, J. Alloys Compd. 306 (2000) 227] and tetragonal [Y. He, G. Wang, Z. Luo, Chin. Phys. Lett. 10 (1993) 667] phases are added for comparison.

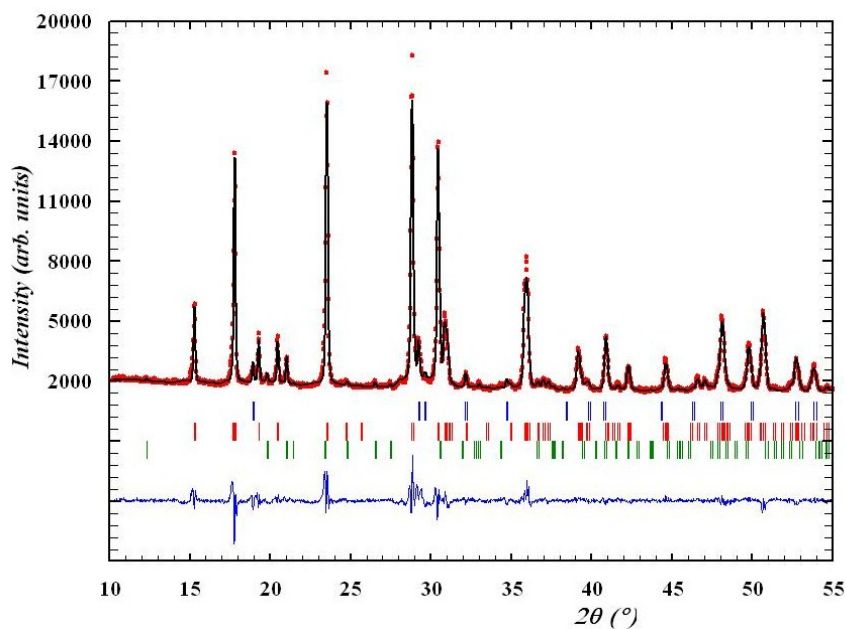

**Figure S2.** Final Rietveld plot for the sample of  $\text{LiY}(\text{WO}_4)_2:\text{Er,Tm}$  calcined at 600°C. The circles are the experimental values; the continuous lines stand for the calculated pattern. Vertical bars correspond to the position of Bragg peaks of tetragonal structure (upper line), monoclinic

phase (middle line) of  $\text{LiY}(\text{WO}_4)_2$  and of  $\text{Li}_2\text{WO}_4$  (bottom line). The bottom curve represents the difference between experimental and calculated diffraction patterns.

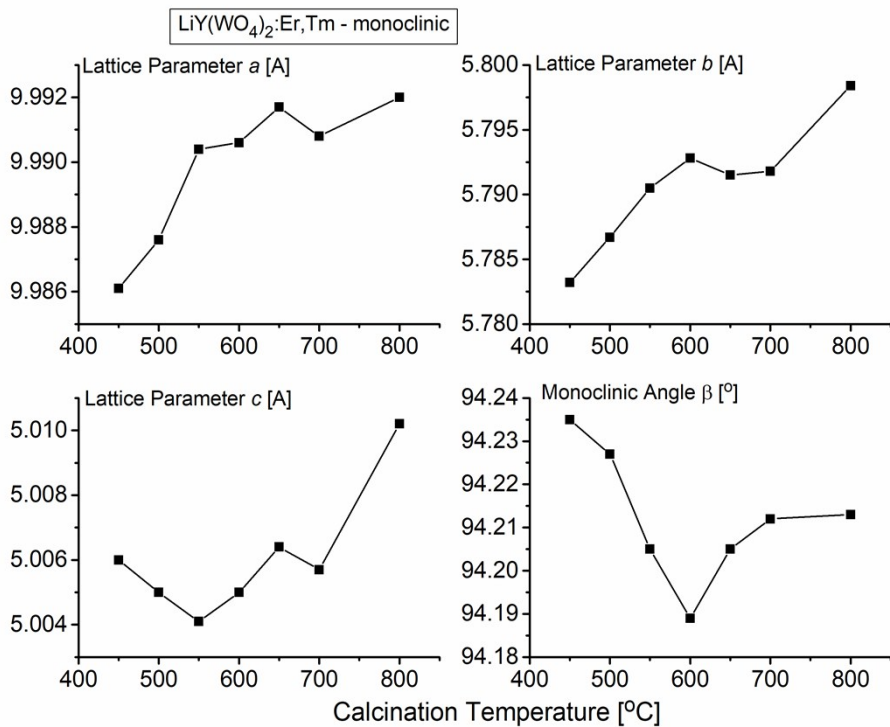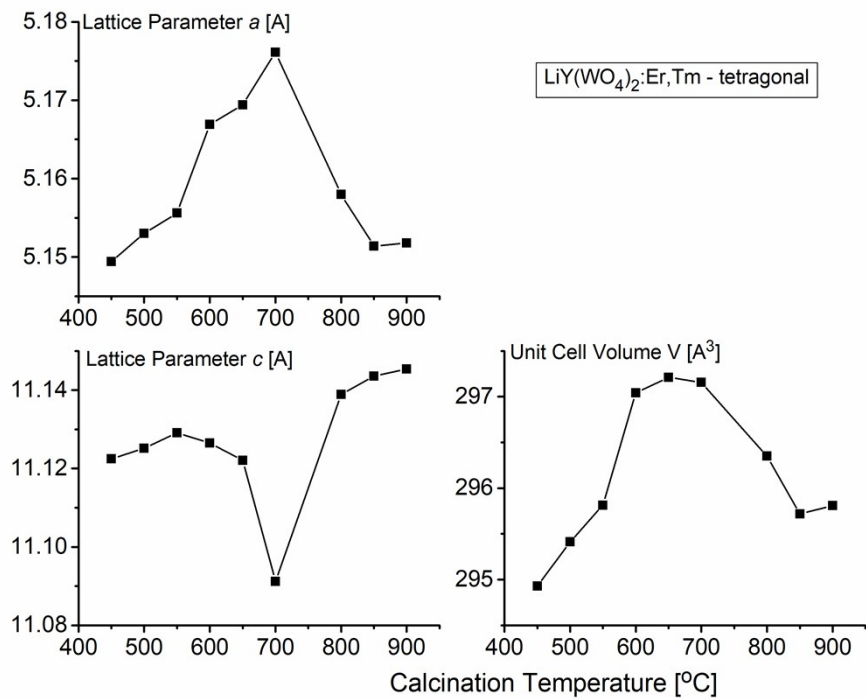

**Figure S3** Lattice parameters vs. calcination temperature for (a) monoclinic and (b) tetragonal phase.

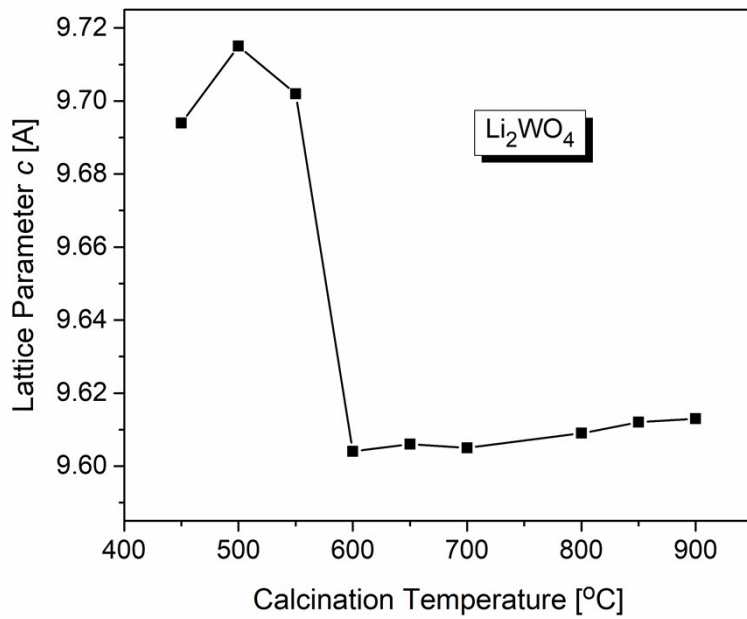

**Figure S4.** Lattice parameter  $c$  of  $\text{Li}_2\text{WO}_4$  nanocrystals vs calcination temperature.

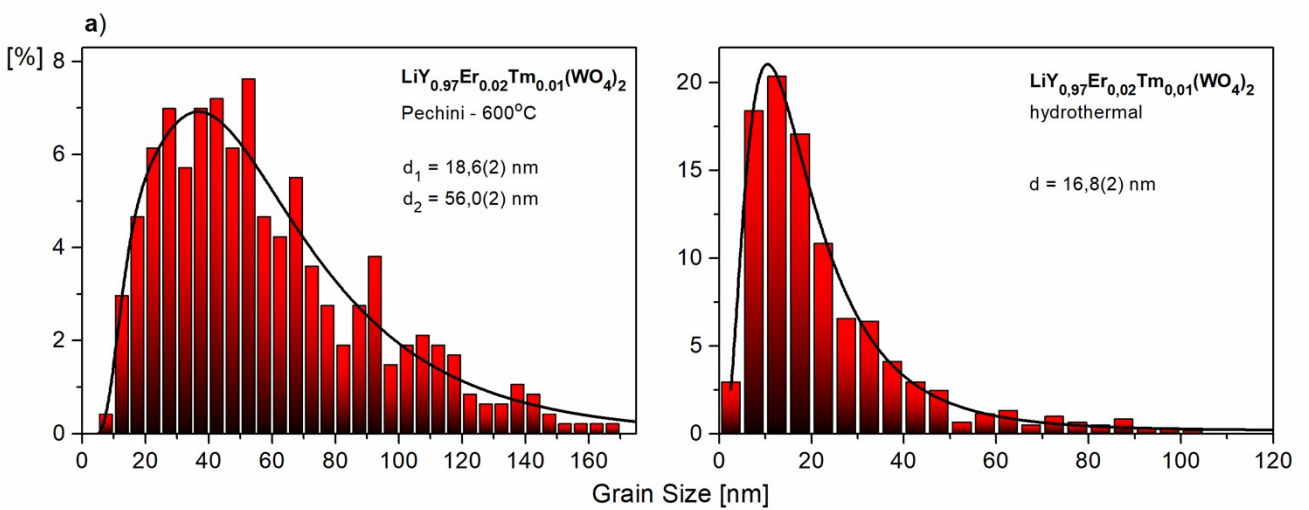

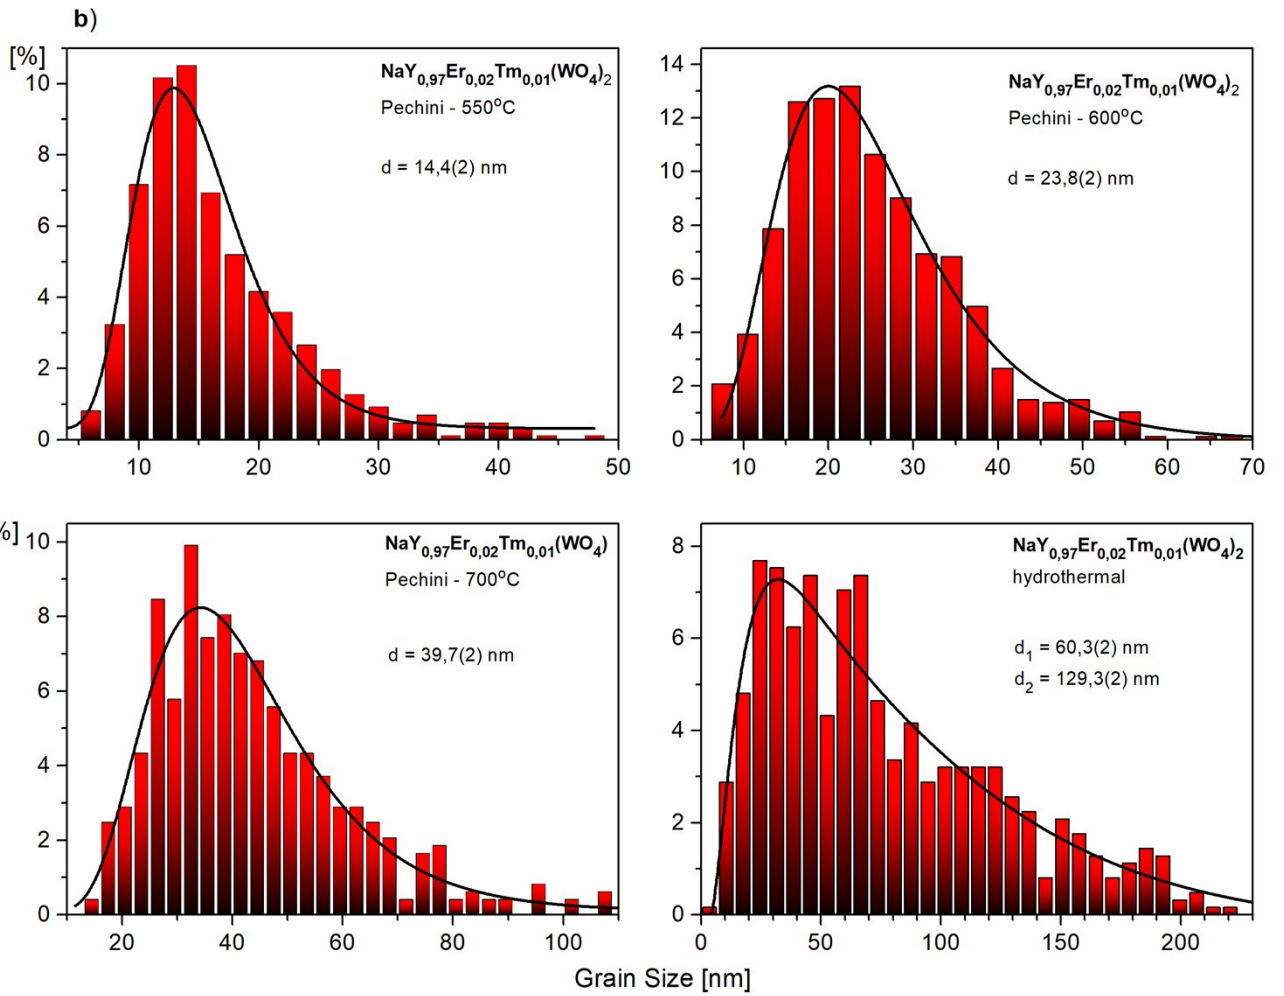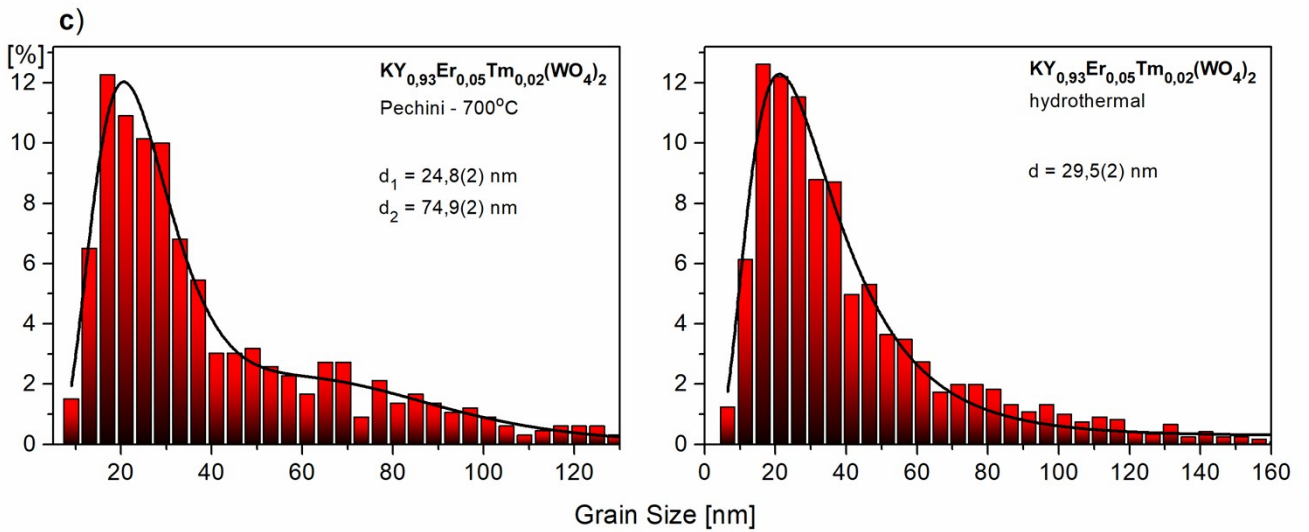

**Figure S5.** Histograms of particle size distribution of (a)  $\text{LiY}(\text{WO}_4)_2:\text{Er,Tm}$ , (b)  $\text{NaY}(\text{WO}_4)_2:\text{Er,Tm}$  and (c)  $\text{KY}(\text{WO}_4)_2:\text{Er,Tm}$  nanopowders. The fitting curves represent double-peak LogNormal approximation.

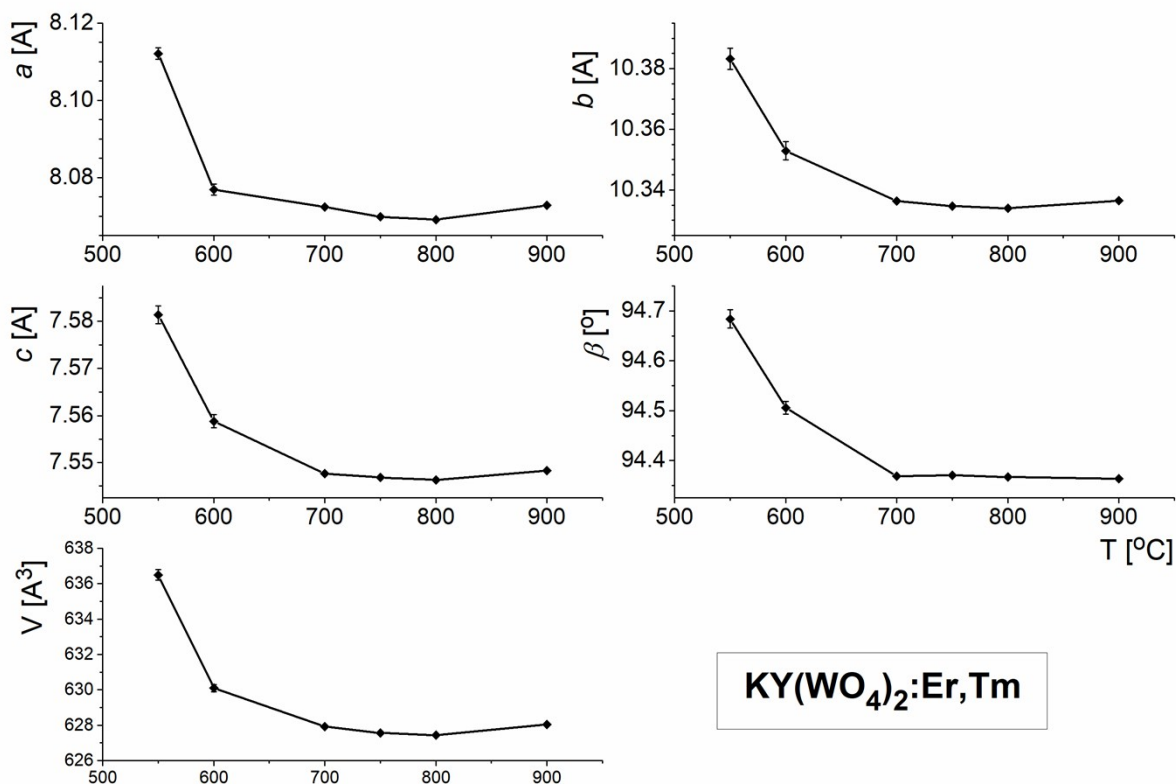

**Figure S6.** Lattice parameters of the main phase of  $\text{KY}(\text{WO}_4)_2:\text{Er,Tm}$  nanocrystals (from Pechini synthesis) vs. calcination temperature.



Table S1. Wavenumbers of IR bands observed for the synthesized samples.

| Li      |         |         |         |         | Na     |        |        |        |        | K      |         |         |         | Assignment                            |
|---------|---------|---------|---------|---------|--------|--------|--------|--------|--------|--------|---------|---------|---------|---------------------------------------|
| 600 C   | 650 C   | 700 C   | 750 C   | 850 C   | 600 C  | 650 C  | 700 C  | 750 C  | 850 C  | 600°C  | 700°C   | 750°C   | 850°C   |                                       |
|         |         |         |         |         |        |        |        |        |        | 974m   |         |         |         | unidentified                          |
| 942sh   | 948sh   | 946sh   | 947sh   |         |        |        |        |        |        | 949m   |         |         |         | v(W-O)                                |
| 921m    | 921m    | 919m    | 918m    | 925sh   | 932w   | 933w   | 931w   | 931w   | 932w   | 927w   | 927m    | 927m    | 926m    | v(W-O)                                |
| 901m    |         |         |         |         |        |        |        |        |        | 889s   | 892s    | 893s    | 890m    | v(WOW)                                |
| 892sh   | 892m    | 891s    | 888vs   |         |        |        |        |        |        | 858vs  |         |         |         | v(WOW)                                |
|         |         |         | 851sh   | 858sh   | 845s   | 847s   | 849vs  | 849vs  | 845vs  | 849vs  | 845s    | 843s    | 842s    | v(W-O)                                |
| 833vs,b | 830vs,b | 836vs,b | 827s    | 829vs,b | 790vs  | 789vs  | 799s   | 797s   | 801vs  |        | 830sh   | 830sh   |         | v(W-O)                                |
| 761m,b  | 770m,b  | 760sh   |         | 797sh   |        |        |        |        |        | 780w,b | 779s    | 778s    | 777m    | v(WOOW)                               |
|         |         |         |         |         |        |        |        |        |        |        | 748m    | 748m    | 749m    | v(WOOW)                               |
|         |         |         |         | 716s    | 720m   | 719m   | 722m   | 721m   | 721m   | 729m   |         |         |         | v(W-O)                                |
| 709m    | 711m    | 709s    | 708vs   |         |        |        |        |        |        | 708m   |         |         |         | v(W-O)                                |
|         |         |         |         |         |        |        |        |        |        | 685m   | 639vs,b | 636vs,b | 635vs,b | v(WOOW)                               |
| 616vs,b | 599s,b  | 602s,b  | 599vs,b |         |        |        |        |        |        | 641m   |         |         |         | v(WOOW)                               |
| 532w    | 531w    | 525m    | 515m    |         |        |        |        |        |        | 610m   | 485m    | 484m    | 484m    | v(WOOW)                               |
| 480m    | 484m    | 489m    | 497sh   | 487sh   |        |        |        |        |        | 483sh  |         |         |         | v(WOOW)                               |
| 442m    | 449m    | 445m    | 445m    | 453m    |        |        |        |        |        | 445m   | 444m    | 443m    | 443m    | $\delta$ (WOOW)                       |
|         |         |         |         | 413w    | 452w   | 452w   | 451w   | 451w   | 451w   | 415m   | 431sh   | 431sh   | 431sh   | $\delta$ (W-O)                        |
| 391w    |         | 394sh   | 391sh   |         |        |        |        |        |        | 401m   | 401m,b  | 400m,b  | 398m,b  | $\delta$ (WOOW)                       |
|         |         |         |         |         |        |        |        |        |        | 370sh  | 356m    | 355m    | 355m    | $\delta$ (WOW)                        |
| 348m,b  | 346s,b  | 345s,b  | 350s,b  |         |        |        |        |        |        | 357m   | 326sh   | 326sh   | 326sh   | and                                   |
|         |         |         |         |         |        |        |        |        |        | 332w   | 317m    | 317m    | 317m    | $\delta$ (W-O)                        |
|         |         |         |         | 326s,b  | 328m,b | 330m,b | 332m,b | 329m,b | 328m,b | 315w   | 293sh   | 293sh   | 293sh   | $\delta$ (W-O)                        |
| 303m    | 305s    | 307s    | 301m    | 291s,b  | 289m,b | 290m,b | 290m,b | 290m,b | 285m,b |        |         |         |         | $\delta$ (W-O)                        |
| 266sh   |         | 267sh   | 266sh   |         |        |        |        |        |        | 286w   | 285m    | 285m    | 285m    | $\delta$ (WOOW)                       |
|         |         |         |         |         |        |        |        |        |        | 253m   | 247m    | 246m    | 246m    | lattice modes                         |
| 250w    | 252m    | 252m    | 249m    |         |        |        |        |        |        | 235m   | 227w    | 227w    | 226w    | lattice modes                         |
| 231sh   |         |         |         | 208m,b  |        |        |        |        |        | 197w   | 216w    | 215w    | 215w    | lattice modes                         |
| 197w    | 200m    | 200w    |         |         | 197w   | 197w   | 197w   | 194w   | 202w   |        | 169m    | 169m    | 169m    | T'(M <sup>+</sup> /Ln <sup>3+</sup> ) |
| 155w    | 158w    | 154w    | 151w    |         |        |        |        |        |        |        | 156m    | 156m    | 155m    | lattice modes                         |
| 122w    | 128w    | 128w    |         |         |        |        |        |        |        |        | 124w    | 124w    | 124w    | lattice modes                         |
| 116sh   |         |         |         |         |        |        |        |        |        |        | 118w    | 118w    | 119w    | T'(WO <sub>6</sub> )                  |

(abbreviations: vs – very strong, s – strong, m – medium, w – weak, vw – very weak, sh – shoulder, b – broad)
